# Supplementary material for: An angiogenesis-related lncRNA signature predicts the immune microenvironment and prognosis of breast cancer
Source: publisher site journal article supplement (doi:10.18632/aging.204930), 2023-08-03
Supplement: Supplementary file [file aging-v15i15-204930-supplementary-material-SD1.pdf]

## SUPPLEMENTARY FIGURE

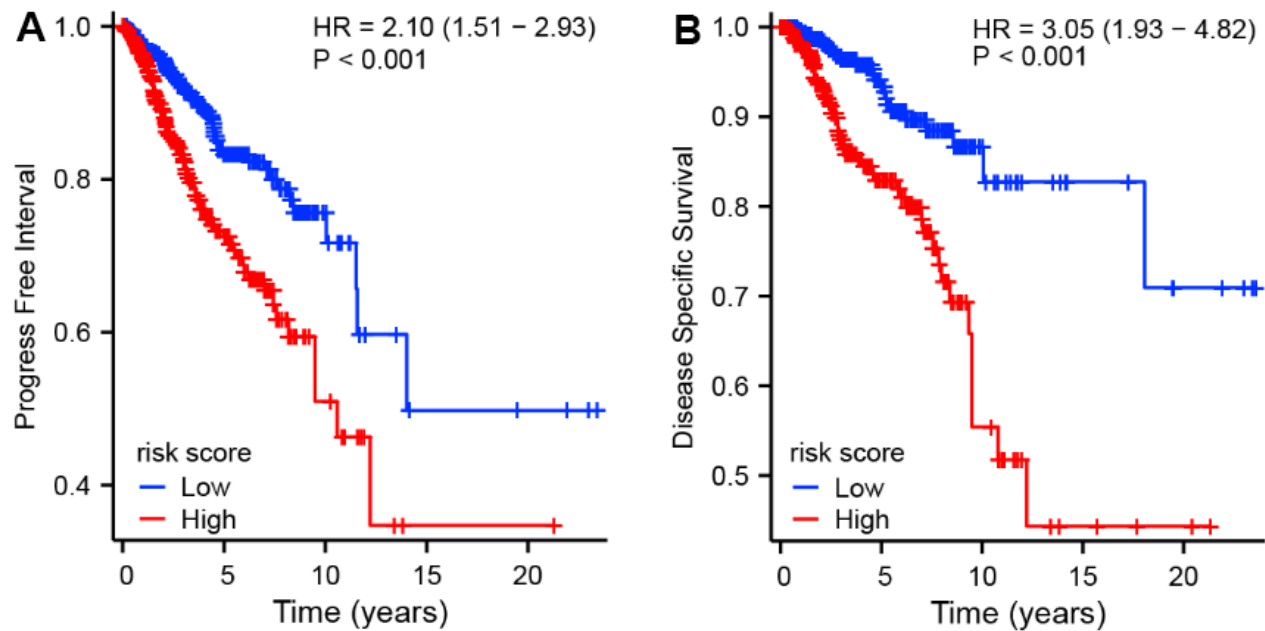

**Supplementary Figure 1.** Kaplan-Meier survival curve analysis suggested that the Progress Free Interval (PFI, **A**) and Disease Specific Survival (DSS, **B**) time of patients with high-risk score were shorter than those with low-risk score ( $P < 0.001$ ).
