# Supplementary material for: An angiogenesis-related lncRNA signature predicts the immune microenvironment and prognosis of breast cancer
Source: Aging (Albany NY). 2023 Aug 3;15(15):7616–36. doi: 10.18632/aging.204930 (PMC10457060; doi:10.18632/aging.204930)
Supplement: Supplementary Table 1 [file aging-15-204930-s002.xlsx]

## Sheet: Sheet1
Supplementary Table 1. Identified lncRNAs associated with angiogenesis.
PPP1R26-AS1
AC007953.2
SPINT1-AS1
Z97200.1
AL391244.1
AC010503.4
HS1BP3-IT1
AC005392.2
ZFHX4-AS1
AC147651.3
AP003469.4
AP003068.1
LINC01140
AC040169.1
LINC01352
AC107021.2
AL050343.1
MIR210HG
LINC01354
LINC00630
AP001189.1
AC008957.2
OIP5-AS1
CD81-AS1
AC084125.4
AC002546.1
AC011445.2
AL109924.2
AC087286.2
EMX2OS
AC005479.1
AC136424.2
COL4A2-AS1
AL139260.1
LINC00941
AP003071.4
AL357992.1
AC000403.1
AC016924.1
AC100803.1
AC103974.1
LINC02257
AC134312.5
AP001505.1
AL031316.1
LINC02407
MIR4435-2HG
BX322234.1
AC007390.2
AC108673.3
AC008915.2
AC016773.1
AP000695.2
AC087286.4
AC027288.3
COL18A1-AS2
AC245595.1
LINC01638
LINC01983
AC079298.3
AC073611.1
AC087623.3
AC145098.1
AL645608.7
AL035448.1
AP001021.1
AC018695.4
MELTF-AS1
DNAJC9-AS1
AC010531.5
AC013565.1
AL136366.1
AC008906.1
AL591468.1
LINC02202
EGFR-AS1
AC009093.1
AC021739.4
AC007998.3
AL844908.1
RPARP-AS1
AC092376.2
AL109761.1
FAM83A-AS1
MIR31HG
YTHDF3-AS1
AC020765.2
AP002954.1
AC069307.1
AC087045.2
AC012306.2
AC004825.2
APTR
MIR99AHG
AC106786.2
LINC01614
AC009229.2
AC245041.2
AL163051.1
AC067852.2
HAND2-AS1
AC104667.2
AC073195.1
AL118556.1
AC026801.2
TM4SF19-AS1
AC017101.1
LINC01752
AC112715.1
HOXA11-AS
AL121821.1
LINC01485
AL133415.1
AC004988.1
LINC02126
AC027031.2
FP671120.4
AC026369.3
MIR100HG
LIPE-AS1
AC097534.2
PICSAR
LINC02185
AL138995.1
Z68871.1
OGFRP1
AL513283.1
LINC01816
AC092818.1
AC109322.1
AC017071.1
FLJ37453
AC012510.1
MBNL1-AS1
ATP2A1-AS1
AL662844.4
AC226118.1
AZIN1-AS1
AC022034.3
AC087482.1
LINC01589
BX322562.1
FLJ42351
AL355472.1
MEG3
AC105389.2
AC009486.1
AC138356.1
SNHG10
AC107398.2
LINC02298
AC005034.5
AL591686.1
AC008771.1
LINC01197
CYP1B1-AS1
LINC00702
AL139246.5
LINC01852
AC040162.3
MKNK1-AS1
AC093278.2
LINC02328
AC087623.1
AC007376.2
HOTAIRM1
HCG11
AP003555.2
AC016735.1
ARRDC1-AS1
AC002398.1
AC011978.2
AC023301.1
AC107375.1
AC137932.2
AC062017.1
AC007552.2
MAFA-AS1
AC079921.1
SFTA1P
AP001350.1
LINC01235
AC087623.2
SH3RF3-AS1
AC008957.1
AC093895.1
H1FX-AS1
NR2F1-AS1
GAS1RR
AP000640.1
AC069120.1
MIR22HG
LINC02356
AL451085.2
AC073316.1
AL591721.1
AC105001.1
AC244517.6
AC008687.3
AC007750.1
AL355073.2
AC125603.3
LINC00900
AC011899.2
POLH-AS1
TBX5-AS1
LINC02104
AADACL2-AS1
AP001893.1
AC108449.2
AC068338.3
LINC01711
AC107926.1
FLJ46906
AC100810.1
AC013553.3
AP006621.3
FLJ20021
AP001434.1
CARD8-AS1
BAALC-AS1
AC010331.1
FIRRE
AC114811.2
SUCLG2-AS1
MAFG-DT
AC016888.1
AC107214.2
AL157394.1
ACAP2-IT1
LNCSRLR
AC092614.1
AC092802.1
AC005674.2
LINC01863
AC007336.2
AL035461.2
AC006213.5
BTG3-AS1
AC097478.1
MSC-AS1
HSPC324
LINC00519
AC004112.1
AL078581.1
MMP2-AS1
SOX9-AS1
AC108463.2
AC107959.1
AC105219.3
AC069209.1
AC092809.2
AC234775.3
ZSCAN16-AS1
AC024909.2
PARAL1
AC083880.1
AC010457.1
AC093797.1
AC009779.2
AC132872.1
AC016876.3
AC092611.2
AL391069.2
AC121247.1
ADAMTS9-AS1
AL671710.1
AC016644.1
TOLLIP-AS1
AC004160.1
AC083843.2
AL137060.1
LINC01705
AC036214.2
LINC01094
LINC02550
AP000695.1
LINC01615
LINC01301
VCAN-AS1
AC005540.1
AL049838.1
AL121760.1
AC006059.1
CTD-2201I18.1
AP001596.1
AC010973.2
LINC02587
ST7-AS2
MIR200CHG
AC022150.4
OTUD6B-AS1
XXYLT1-AS2
AF015262.1
AC133552.5
AL122035.1
AL358234.1
AF186192.1
CADM3-AS1
LINC01230
DNM3OS
LINC00640
AC006272.1
AL354766.2
AL355001.2
AL139393.2
KMT2E-AS1
AC060766.7
LINC01767
ADAMTS9-AS2
AC116552.1
LINC01504
LINC01023
AL109741.1
LINC00922
LINC01497
BLACAT1
ATP2C2-AS1
LINC01978
HRAT92
AC138207.2
AC009093.2
MYOSLID
AL451165.2
AC025175.1
VIM-AS1
AC005291.2
AC096921.2
AC008050.1
AP003481.1
AC138207.4
SNHG9
RNF144A-AS1
ACTA2-AS1
LINC01561
TCERG1L-AS1
LINC01637
AC083862.2
AL117335.1
LINC02188
AC008443.4
Z82185.1
DICER1-AS1
PXN-AS1
AC107021.1
AC011899.3
MIR497HG
AL136084.3
HID1-AS1
DNAJC27-AS1
SLC12A5-AS1
AF127936.1
LINC01150
MAGI2-AS3
AC097662.1
LINC01655
AC027601.2
AC114284.1
AL161668.4
AC109587.1
LINC01268
AC000067.1
TBX2-AS1
AC009065.4
CYTOR
AC011442.1
AC008610.1
LINC01985
AL139339.1
AC026124.2
AC098613.1
AC015712.4
SLC9A3-AS1
AL357054.4
LINC01943
LINC01929
AC040970.1
PITPNA-AS1
AC022165.1
RNASEH1-AS1
LINC01629
LINC01311
AC136424.1
SNHG17
LINC00840
AL513303.1
AL139147.1
AF230666.1
LINC00924
SNHG15
DSCAM-AS1
AJ011932.1
AC087362.2
AC063948.1
AC087392.1
SLCO4A1-AS1
HLX-AS1
LINC02580
ZNF252P-AS1
AC092384.2
AC010531.6
AL391097.2
RAB11B-AS1
AC010307.4
AL354732.1
LINC02461
AC090181.2
VASH1-AS1
CAHM
AC064807.1
AC062004.1
AL161452.1
MED14OS
TRHDE-AS1
RHPN1-AS1
KIRREL3-AS1
AC068473.4
AC004816.2
AL445426.1
AC080038.1
PTPRD-AS1
ST7-OT4
LINC00310
NFIA-AS2
AL139289.2
LINC02544
AC010185.1
CH17-340M24.3
SNHG7
AC069281.2
EPB41L4A-AS1
PRKCZ-AS1
AC073072.1
AP001065.1
AC067930.1
LINC01137
RNF157-AS1
AC090559.1
AC135178.1
AL606534.1
AC005291.1
AL356218.1
AC005021.1
AC027702.1
AL590004.3
AC114730.3
AP001189.3
AL390719.2
AC074011.1
MHENCR
AC011676.1
AC100803.2
AL513320.1
AP005205.2
UBXN10-AS1
L3MBTL4-AS1
AC084033.3
AC025035.1
AL928654.1
AC011893.1
AC121757.1
SAMD12-AS1
AC006942.1
AC090125.1
